# Supplementary material for: Searching for novel crystal forms by in situ high-pressure crystallisation: the example of gabapentin heptahydrate
Source: Royal Society of Chemistry journal article supplement (doi:10.1039/b924573a), 2010-01-01
Supplement: b924573a.pdf [file b924573a.pdf]

# Searching for novel crystal forms by *in situ* high-pressure crystallisation: the example of gabapentin heptahydrate

Francesca P. A. Fabbiani, Demetrius C. Levendis, Gernot Buth, Werner F. Kuhs, Norman Shankland and Heidrun Sowa

## Electronic Supplementary Information

### Contents:

Structural overlay of gabapentin heptahydrate, dataset 1 and 2

p 1

Structural overlay of gabapentin forms

p 3

CSD searches details

pp 2-4

Surfaces definitions

pp 5

Molecular volume calculations

pp 5

### Structural overlay of gabapentin heptahydrate, dataset 1, 2 and 1+2

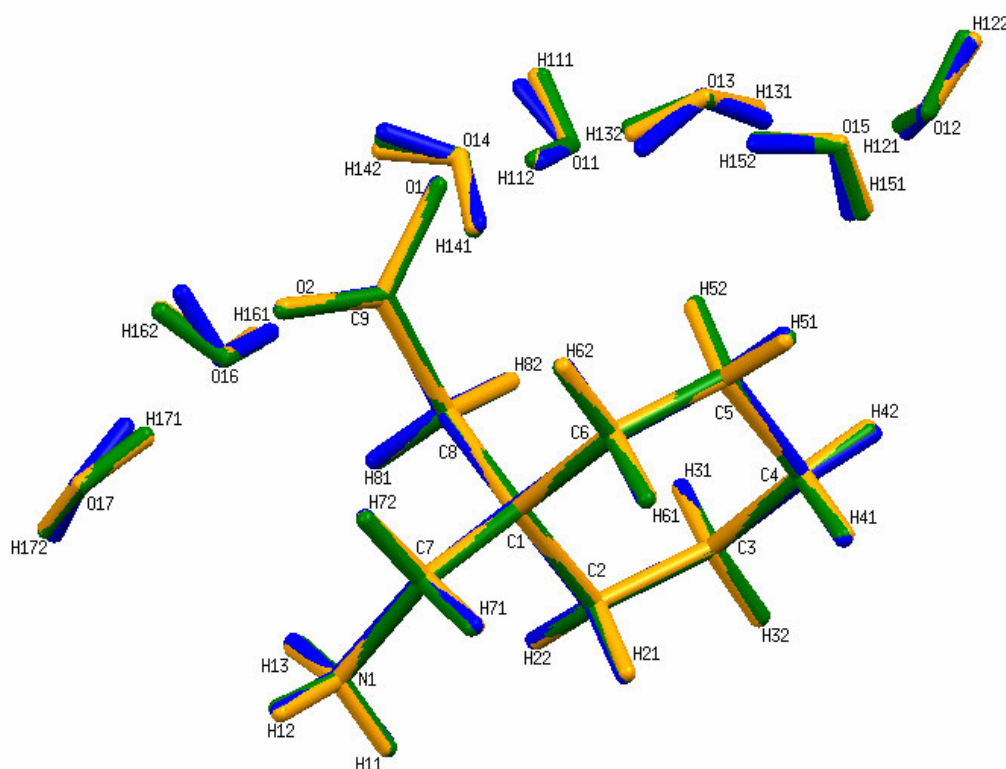

Colouring Scheme:

Dataset 1: blue

Dataset 2: orange

Dataset 1+2: green

Data completeness for dataset 1: 33% to 0.9 Å

Data completeness for dataset 2: 36% to 0.81 Å

Data completeness for combined dataset: 52% to 0.81 Å

## Structural overlay of gabapentin zwitterions

H-atoms have been omitted for clarity

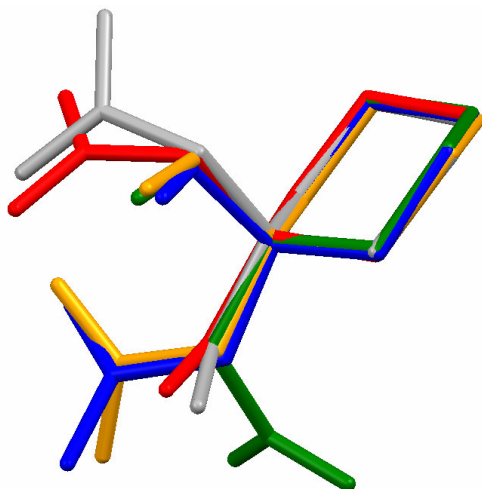

Colouring Scheme:

- Aminomethyl group in equatorial position:

$\beta$ -gabapentin: red

Gabapentin heptahydrate: light grey

- Aminomethyl group in axial position:

$\alpha$ -gabapentin: blue

$\gamma$ -gabapentin: orange

Gabapentin monohydrate (form I and II have the same conformation): green

## CSD searches for "heptahydrate" structures:

Define four CSD subsets:

1- CSD subset of 167 216 structures: "organic-only structures" for which 3D-coordinates had been determined and had an *R*-factor below 10%, no errors, and were not polymeric (CSD version 5.30, Nov. 2008 +1 update).

2- CSD subset of 141 384 structures: as in 1, but excluding disordered structures (*i.e.* disorder in either solvent or solute).

3- CSD subset of 376 547 structures: as in 1, but including organometallic structures.

4- CSD subset of 297 290 structures: as in 2, but including organometallic structures.

| CSD subset | Number of hits | Number of unique hits | Number of unique hits, with no disorder reported for water molecules | Refcodes in file |
|------------|----------------|-----------------------|----------------------------------------------------------------------|------------------|
| 1          | 64             | 60                    | 48                                                                   | Search1.gcd      |
| 2          | 40             | 36                    | 36                                                                   | Search2.gcd      |
| 3          | 351            | 338                   | 244                                                                  | Search3.gcd      |
| 4          | 211            | 204                   | 204                                                                  | Search4.gcd      |

Comparison with study by van de Streek and Motherwell, *CrystEngComm*, 2007, **9**, 55–64:

CSD subset :100 864 "organic-only structures".

- of 5232 "hydrates-only" structures, eleven are heptahydrates: BACMIB10, CEHDIC, CPMIAL10, DAVHUD, FOYYUN, MEGXIF, SAQZUF02, TYRPXL10, WUNMUN, YUJJAO, ZEKBAS

- of 364 "hydrates-of anhydrides" structures, one is heptahydrate: DAFNOO

**Mercury Materials Module using "Motif Search" and "Crystal Packing Feature" tools and a "medium" level of geometrical similarity. H-atoms were not included in the searches**

**CSD searches for "L4(6)6(8)" motif:**

| <i>CSD subset</i> | <i>Refcodes</i> | <i>r.m.s.</i> |
|-------------------|-----------------|---------------|
| <b>1</b>          | BULMEA02        | 0.439         |
|                   | BUMLEA03        | 0.433         |
|                   | HEKXAW          | 0.21          |
|                   | RABCEY          | 0.44          |
| <b>2</b>          | HEKXAW          | 0.21          |
|                   | RABCEY          | 0.44          |
| <b>3</b>          | BULMEA02        | 0.439         |
|                   | BUMLEA03        | 0.433         |
|                   | DUJRUUV         | 0.21          |
|                   | HEKXAW          | 0.44          |
|                   | NARYOU          | 0.571         |
|                   | RABCEY          | 0.352         |
|                   | SALYUZ          | 0.222         |
|                   | TMAMOH04        | 0.623         |
|                   | VINKIN          | 0.626         |
|                   | WIFGOH          | 0.396         |
| <b>4</b>          | DUJRUUV         | 0.21          |
|                   | HEKXAW          | 0.44          |
|                   | NARYOU          | 0.571         |
|                   | RABCEY          | 0.352         |
|                   | SALYUZ          | 0.222         |
|                   | VINKIN          | 0.626         |
|                   | WIFGOH          | 0.396         |

**CSD searches for "R4D2" motif**

This motif is more common than the "L4(6)6(8)" one; only the results from the search within the CSD subset **2** are reported below.

| <i>CSD subset</i> | <i>Refcodes</i> | <i>r.m.s.</i> |
|-------------------|-----------------|---------------|
| <b>2</b>          | DUDPOH          | 0.232         |
|                   | EFAMIH          | 0.342         |
|                   | FAJVOB          | 0.22          |
|                   | FAVRID          | 0.357         |
|                   | GADROT          | 0.461         |
|                   | GIGQOD          | 0.482         |
|                   | ISUSUK          | 0.44          |
|                   | KOYTIB          | 0.282         |
|                   | LOHQAA          | 0.254         |
|                   | MUSJUV          | 0.437         |
|                   | NASRII          | 0.1           |
|                   | ODORUV          | 0.269         |
|                   | RAJKES          | 0.195         |
|                   | REPLIH          | 0.452         |
|                   | SOYRAZ          | 0.145         |
|                   | ZIWHUI          | 0.467         |
|                   | ZZZSSY02        | 0.329         |

Further criterion used for the CSD searches: O...O distance less than the sum of the vdW radii.

---

## Surfaces definitions

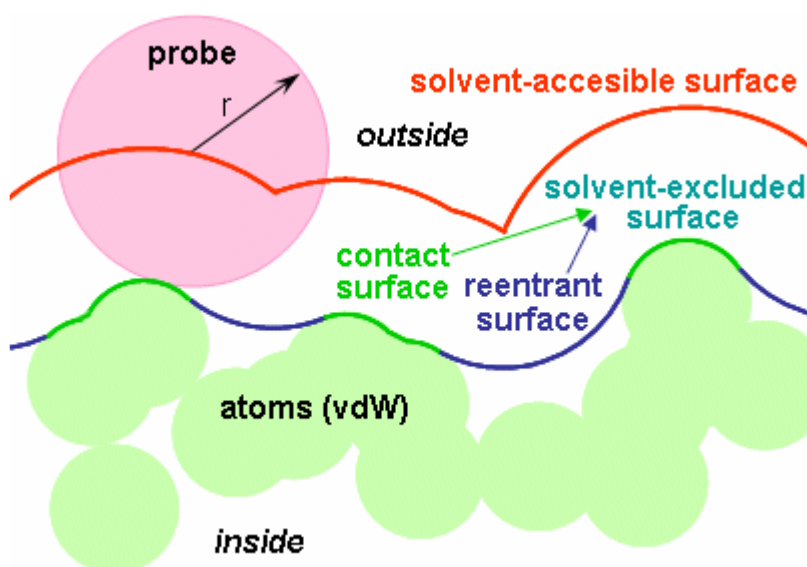

Reproduced from <http://jmol.sourceforge.net/docs/surface/>

Based on <http://geometry.molmovdb.org/3v/> and

<http://www.netsci.org/Science/Compchem/feature14.html>

Note: The solvent-excluded surface is also known as the Connolly surface.

The surfaces detailed above are drawn *around* a molecule of interest. Similarly, these surfaces can also be applied to void space determination ("inside" becomes "outside"), so that:

| Surface calculation for | Volume inside the surface                             |
|-------------------------|-------------------------------------------------------|
| Molecule →              | Solvent-accessible surface > Solvent-excluded surface |
| Void →                  | Solvent-accessible surface < Solvent-excluded surface |

## Molecular volume calculations

A positive molecular volume change of 30% was calculated for gabapentin heptahydrate ( $T = 298\text{ K}$ ), with respect to the  $\alpha$ -anhydrous form ( $T = 153\text{ K}$ ). Molecular volume calculations were based on equations 1 and 2 as detailed on p. 58 in the paper by van de Streek and Motherwell (J. van de Streek and S. Motherwell, *CrystEngComm*, 2007, **9**, 55–64). Hofmann's molecular volume of water ( $21.55\text{ \AA}^3$ , see D. W. M. Hofmann, *Acta Crystallogr., Sect. B: Struct. Sci.*, 2002, **58**, 489.) was used in the calculations.
